# Supplementary material for: Associations between Sclerostin and Anthropometric and Metabolic Parameters in Children and Adolescents
Source: MDPI journal article supplement (doi:10.3390/children8090788), 2021-09-09
Supplement: s1 [file s1]

**Table S1.** Demographic, clinical, and laboratory data for pre-, early, and late pubertal subjects

| Characteristic                        | Prepubertal subjects<br>(Tanner stage 1)<br>(n = 24) | Early pubertal subjects<br>(Tanner stage 2–3)<br>(n = 29) | Late pubertal subjects<br>(Tanner stage 4–5)<br>(n = 10) | <i>p</i> value       |                                  |
|---------------------------------------|------------------------------------------------------|-----------------------------------------------------------|----------------------------------------------------------|----------------------|----------------------------------|
|                                       |                                                      |                                                           |                                                          | Overall <sup>a</sup> | Early vs. late pubertal subjects |
| Age, years                            | 9.2 (8.5–10.4)                                       | 11.2 (9.5–12.2)                                           | 14.2 (12.9–15.2)                                         | <0.001               | <0.001                           |
| Male sex                              | 16/32 (66.7)                                         | 11/29 (37.9)                                              | 5/10 (50.0)                                              | 0.11                 | 0.71                             |
| Height SDS                            | 0.81 (-0.28–2.85)                                    | 0.57 (-1.27–2.25)                                         | 0.07 (-0.93–2.34)                                        | 0.72                 | 0.99                             |
| BMI, kg/m <sup>2</sup>                | 20.6 (13.9–36.0)                                     | 21.0 (14.2–33.5)                                          | 25.3 (17.3–35.5)                                         | 0.23                 | 0.12                             |
| BMI SDS                               | 1.38 (-0.54–2.78)                                    | 0.64 (-1.91–3.03)                                         | 1.36 (-1.18–2.73)                                        | 0.83                 | 0.72                             |
| Fasting glucose, mg/dL                | 94 (83–118)                                          | 92 (84–106)                                               | 92 (86–101)                                              | 0.64                 | 0.72                             |
| Fasting insulin, mg/dL                | 7.7 (4.5–32.3)                                       | 6.9 (3.9–32.2)                                            | 9.9 (5.4–17.9)                                           | 0.29                 | 0.11                             |
| IGF-1, ng/mL                          | 204.2 (84.6–326.9)                                   | 328.9 (175.6–651.6)                                       | 490.5 (230.4–757.9)                                      | <0.001               | 0.11                             |
| HOMA-IR                               | 2.1 (1.2–8.6)                                        | 2.1 (1.0–7.1)                                             | 2.9 (1.7–4.8)                                            | 0.11                 | 0.04                             |
| Total cholesterol, mg/dL <sup>b</sup> | 187 (120–220)                                        | 170 (122–240)                                             | 174 (120–198)                                            | 0.04                 | 0.90                             |
| LDL cholesterol, mg/dL <sup>b</sup>   | 110 (75–198)                                         | 95 (71–173)                                               | 105 (84–120)                                             | 0.37                 | 0.94                             |
| HDL cholesterol, mg/dL <sup>b</sup>   | 53 (38–89)                                           | 50 (32–95)                                                | 44 (36–50)                                               | 0.047                | 0.07                             |
| Triglycerides, mg/dL <sup>b</sup>     | 109 (65–297)                                         | 110 (80–339)                                              | 95 (88–252)                                              | 0.73                 | 0.31                             |
| Dyslipidemia <sup>b</sup>             | 7/16 (43.8)                                          | 11/26 (42.3)                                              | 2/10 (20.0)                                              | 0.41                 | 0.27                             |
| ALP, U/L                              | 758 (92–1108)                                        | 812 (520–1141)                                            | 640 (254–920)                                            | 0.22                 | 0.09                             |
| 25-hydroxy vitamin D, ng/mL           | 12.5 (7.0–25.1)                                      | 13.5 (6.0–23.4)                                           | 9.3 (5.2–16.7)                                           | 0.20                 | 0.08                             |
| Osteocalcin, ng/mL                    | 62.7 (35.8–118.9)                                    | 81.9 (43.6–173.0)                                         | 66.6 (10.8–204.0)                                        | 0.03                 | 0.37                             |
| Sclerostin, pmol/L                    | 19.7 (16.7–25.6)                                     | 20.9 (15.2–28.8)                                          | 19.2 (17.6–22.9)                                         | 0.54                 | 0.55                             |

Data are median values (range) for continuous variables and number of cases (%) for categorical variables, unless otherwise specified. SDS, standard deviation score; BMI, body mass index; IGF-1, insulin-like growth factor-1; HOMA-IR, homeostasis model assessment-insulin resistance; LDL, low-density lipoprotein; HDL, high-density lipoprotein; ALP, alkaline phosphatase. <sup>a</sup>The significance of differences in continuous variables between three groups was assessed by Kruskal-Wallis test.

<sup>b</sup>Measured in 52 participants: 16 prepubertal, 26 early pubertal and 10 late pubertal subjects.
